# Supplementary material
Source: publisher site journal article supplement (https://www.spandidos-publications.com/5346/downloadSupplementary)
Supplement: Supplementary file 1 [file downloadSupplementary]

Figure S1. SOAT1 expression evaluation in public cancer databases. The UALCAN platform was used to validate SOAT1 expression at both (A) mRNA and (B) protein levels in uterine corpus endometrial carcinoma (UCEC) and matched normal tissues. Information was obtained from the public database available at <http://ualcan.path.uab.edu/>. SOAT1, sterol-o-acyl transferase 1; UCEC, uterine corpus endometrial carcinoma; CPTAC, Clinical Proteomic Tumor Analysis Consortium.

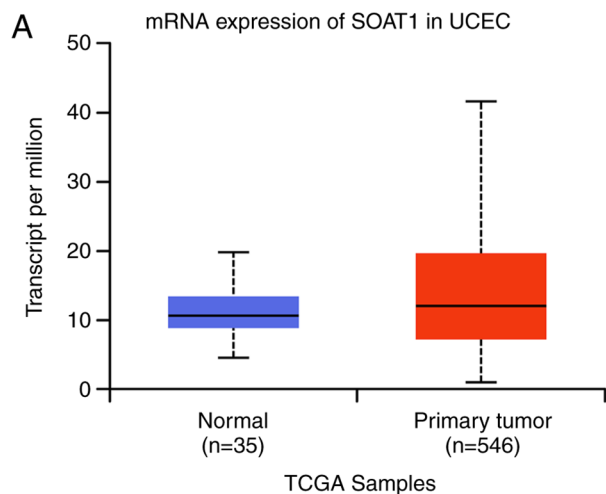

| Comparison         | Statistical significance         |
|--------------------|----------------------------------|
| Normal vs. Primary | $2.2454000000051 \times 10^{-5}$ |

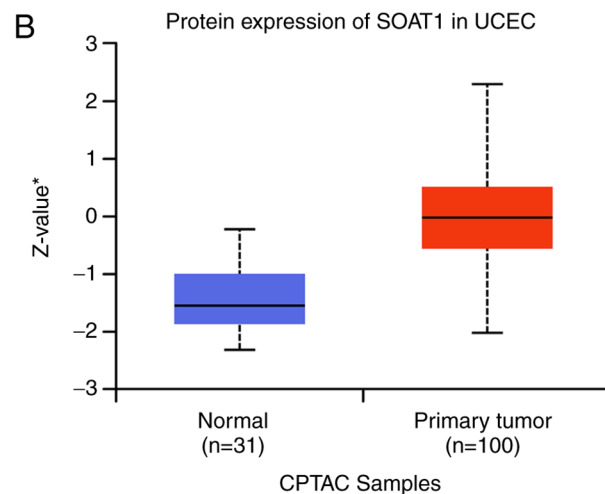

| Comparison         | Statistical significance           |
|--------------------|------------------------------------|
| Normal vs. Primary | $3.28640412725626 \times 10^{-17}$ |

\*Z-values represent standard deviations from the median across samples for the given cancer type. Log<sub>2</sub> spectral count ratio values from CPTAC were first normalized within each sample profile, then normalized across samples.

Figure S2. Spearman correlations of SOAT1 protein levels between tissue, peritoneal fluid and plasma. (A) Correlation between peritoneal fluid and tissue, (B) correlation plasma and tissue and (C) correlation between peritoneal fluid and plasma. Peritoneal fluid, n=37; plasma, n=40; and tissue, n=28. SOAT1, sterol-o-acyl transferase 1.

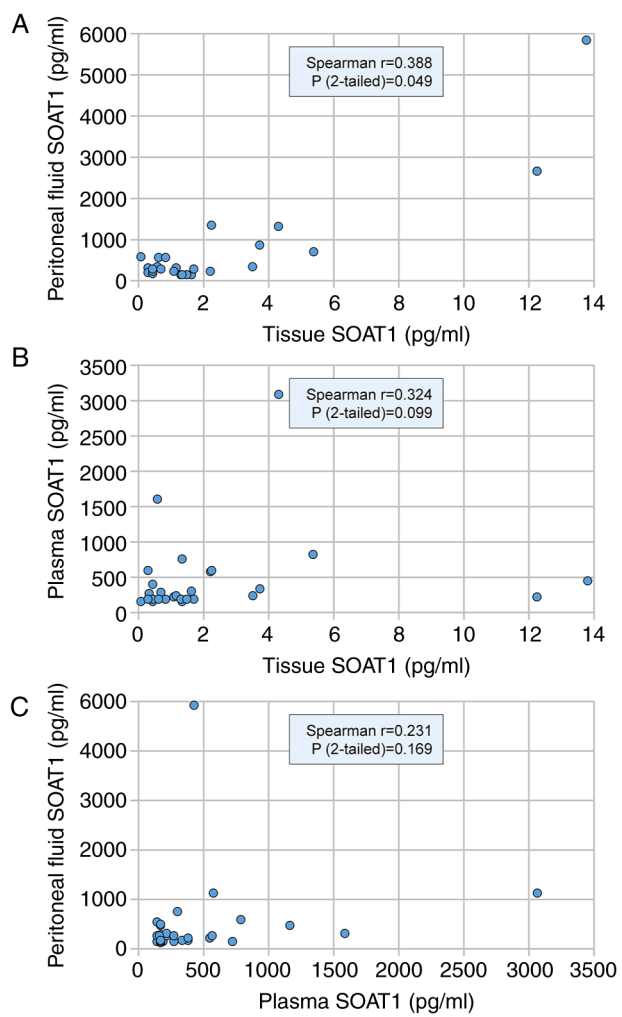

Figure S3. cBioPortal database analysis. Overall survival curves for endometrial cancer patients divided into two groups based on their median SOAT1 gene expression. Information was obtained from the public database available at <https://www.cbioportal.org>. SOAT1, sterol-o-acyl transferase 1; CI, confidence interval.

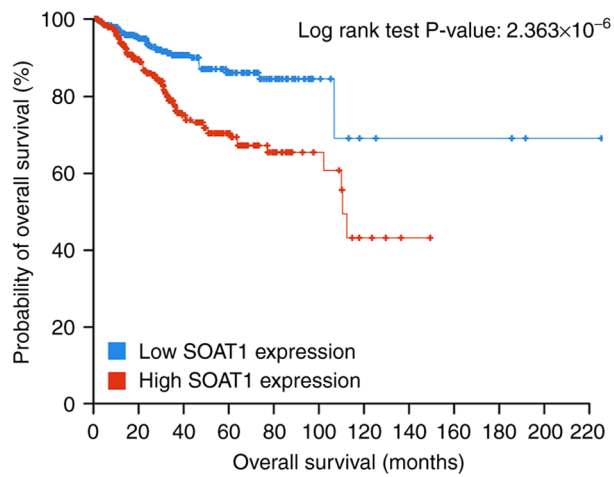

|                             | Number of cases | Number of events | Median months overall (95% CI) |
|-----------------------------|-----------------|------------------|--------------------------------|
| Low expression (-0.65-0.02) | 450             | 40               | NA                             |
| High expression (0.02-2.04) | 448             | 88               | 110.55 (110.02 - NA)           |
